# Supplementary material for: Two-dimensional multiferroic FeCl with room temperature ferromagnetism and tunable magnetic anisotropy via ferroelectricity
Source: Royal Society of Chemistry journal article supplement (doi:10.1039/d1tc01788h), 2021-01-01
Supplement: d1tc01788h1.pdf [file d1tc01788h1.pdf]

## Supporting Information

# Two-dimensional Multiferroic FeCl with Room Temperature Ferromagnetism and Tunable Magnetic Anisotropy via Ferroelectricity

Yingjie Sun,<sup>a</sup> Tao Feng,<sup>a</sup> Xiuling Li,<sup>b</sup> Fang Wu,<sup>c</sup> Haifeng Lv<sup>\*d</sup> and Xiaojun Wu<sup>\*d</sup>

<sup>a</sup>School of Science, Hebei University of Science and Technology, Shijiazhuang, Hebei 050018, China.

<sup>b</sup>School of Physics and Technology, Nanjing Normal University, Nanjing 210023, China

<sup>c</sup>School of Science and Technology, Nanjing Forestry University, Nanjing, Jiangsu 210037, China

<sup>d</sup>Hefei National Laboratory for Physical Sciences at the Microscale, Synergetic Innovation of Quantum Information & Quantum Technology, School of Chemistry and Materials Sciences, and CAS Key Laboratory of Materials for Energy Conversion, University of Science and Technology of China, Hefei, Anhui 230026, China.

Corresponding Author

[\\*hflv@ustc.edu.cn](mailto:hflv@ustc.edu.cn). [\\*xjwu@ustc.edu.cn](mailto:xjwu@ustc.edu.cn).

**Table of Contents**

Table S1: The detailed optimized lattice constants of 2D FeCl crystal

Fig. S1: The possible process for exfoliation of paraelectric FeCl monolayer

Fig. S2: The structural snapshots of BOMD simulation

Fig. S3: Spin charge density and deformation charge density

Fig. S4: The electron localization function (ELF)

Fig. S5: Various magnetic configurations

Fig. S6: The band structure and atom projected density of states for carrier doping

Fig. S7: The spin exchange among Fe atoms.

### Supporting Tables

Table S1 The optimized lattice constants of 2D FeCl crystal within PBE and HSE06 functionals, respectively.

|              | PBE(Å)    | HSE(Å)    |
|--------------|-----------|-----------|
| <b>a</b>     | 3.22      | 3.30      |
| <b>b</b>     | 3.61      | 3.57      |
| <b>Fe-Fe</b> | 2.54      | 2.58      |
| <b>Fe-Cl</b> | 2.37/2.40 | 2.39/2.42 |
| <b>d</b>     | 3.71      | 3.71      |

### Supporting Figures

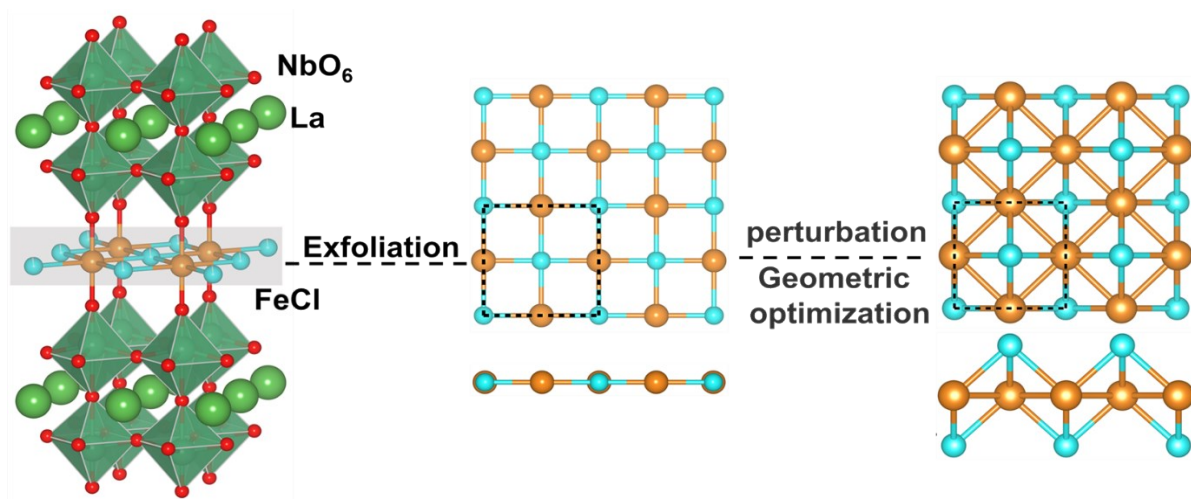

Fig. S1 The possible exfoliation process of paraelectric FeCl monolayer from layered oxyhalide (FeCl)LaNb<sub>2</sub>O<sub>7</sub>.

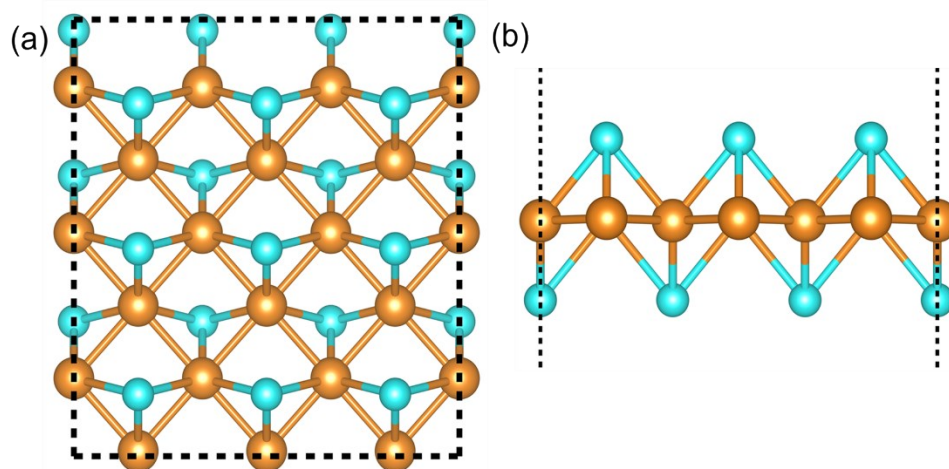

Fig. S2 The structural snapshots of 2D FeCl crystal at time of 5 ps during BOMD simulation under the temperatures of 300K.

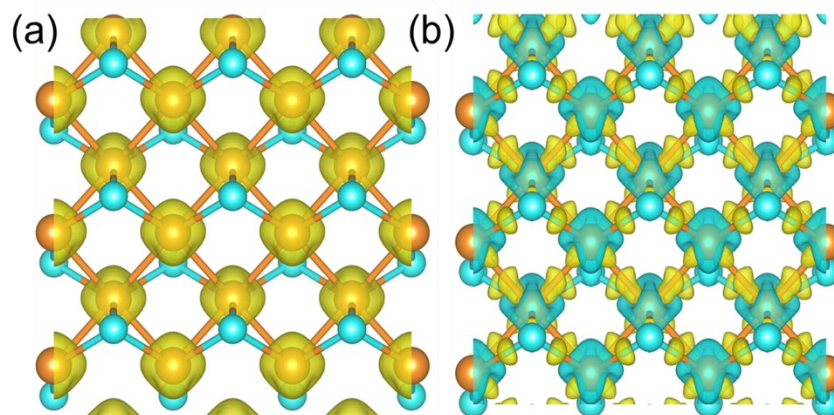

Fig. S3 The spin charge density distribution with an isosurface value of  $0.02 \text{ e/Bohr}^3$ , (b) The deformation charge density distribution with an isosurface value of  $0.01 \text{ e/Bohr}^3$ , Blue and yellow denote the charge density depletion and accumulation, respectively.

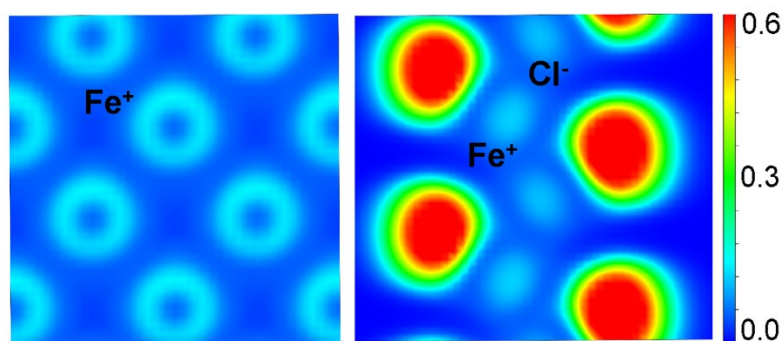

Fig. S4 The Fig.s left and right represent top view of the ELF pattern containing the Fe-Fe bonds and cross-sectional ELF pattern containing Fe-Cl bonds, respectively.

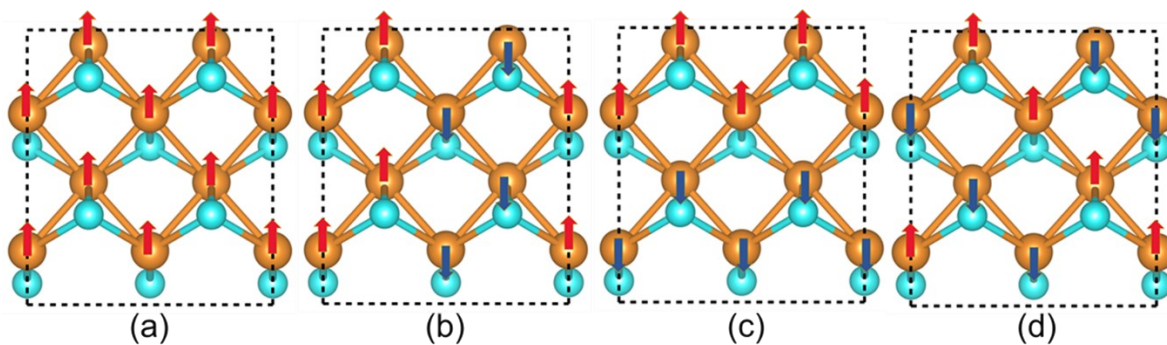

Fig. S5 (a), (b), (c) and (d) are the ferromagnetic (FM), antiferromagnetic AF1, AF2 and AF3 states, respectively. The black and blue arrows show the spin up and down orientations, respectively. The brown and green spheres represent the Fe and Cl atoms, respectively.

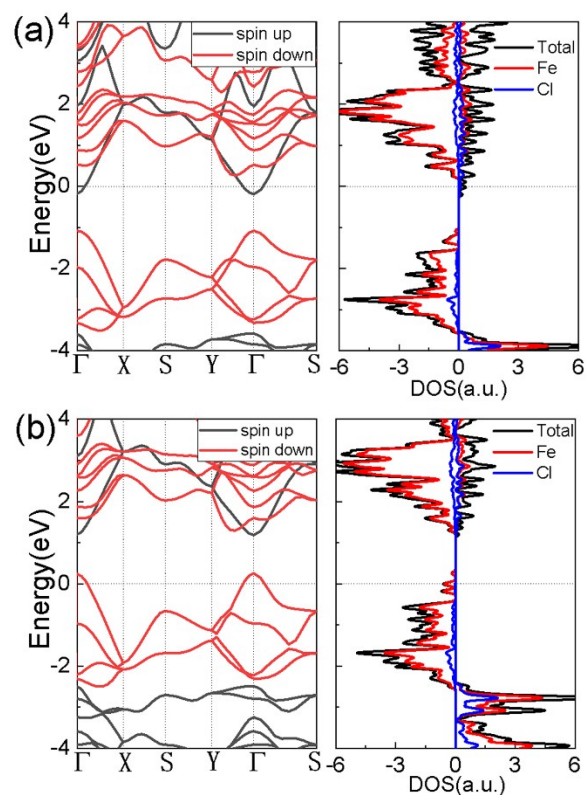

Fig. S6 Band structures and atom projected density of states for (a) electron-doped and (b) hole-doped FeCl monolayers under electron and hole doping, respectively. The Fermi levels are all set to zero.

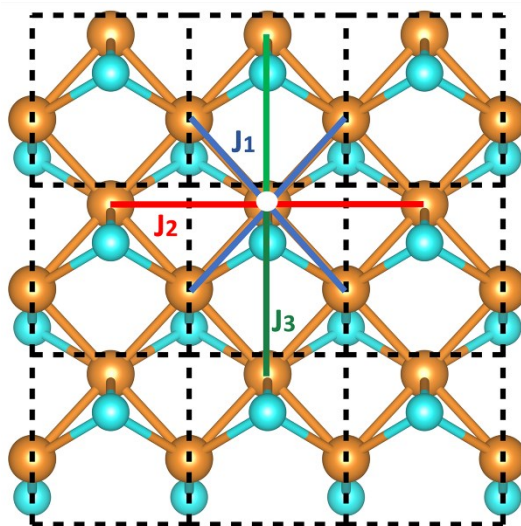

Fig. S7 The spin exchange parameters  $J_1$ ,  $J_2$ , and  $J_3$ , representing the first-nearest, second-nearest and third-nearest neighboring exchange parameters, respectively.

### Calculation of Young's modulus

The Young's modulus of 2D FeCl is calculated to estimate the in-plane stiffness. The calculated in-plane Young's modulus is about  $43 \text{ N m}^{-1}$ , which is comparable to germanene ( $42 \text{ N m}^{-1}$ ), implying that 2D FeCl is mechanically stable.<sup>1</sup>

1. L.-M. Yang, I. A. Popov, T. Frauenheim, A. I. Boldyrev, T. Heine, V. Bačić and E. Ganz, *Phys. Chem. Chem. Phys.*, 2015, **17**, 26043-26048.
